# Supplementary material for: Do doctors understand the test characteristics of lung cancer screening?
Source: Springer Nature journal article supplement (doi:10.1007/s00508-017-1305-9), 2018-01-25
Supplement: MOESM2 [file 15416976]

Thank you for participating in our study.

Please answer the following questions regarding the case vignettes based on your personal knowledge. Please use only the provided information. The use of a calculator is allowed. If you cannot answer a question, please skip it and move to the next one.
